# Supplementary material
Source: publisher figshare collection journal article supplement (https://karger.figshare.com/ndownloader/files/27922452)
Supplement: Supplementary file 1 [file 27922452]

**Supplementary Table 1.** Discrimination values of the various CHA2DS2-VASc risk models in the NSTE-ACS and STEMI patients subgroups.

|  | **NSTE-ACS** | | **STEMI** | |
| --- | --- | --- | --- | --- |
|  | **C-statistic** | **P** | **C-statistic** | **P** |
| **In-Hospital Mortality (N = 908)** |  | |  | |
| **CHA2DS2-VASc** | 0.80 | <0.0001 | 0.73 | <0.0001 |
| **CHA2DS2-VASc-R1** | **0.83 | <0.0001 | 0.75 | <0.0001 |
| **CHA2DS2-VASc-R2** | **0.84 | <0.0001 | 0.76 | <0.0001 |
| **CHA2DS2-VASc-R3** | **0.86 | <0.0001 | 0.75 | <0.0001 |
| **Post Discharge Mortality (N = 865)** |  | |  | |
| **CHA2DS2-VASc** | 0.71 | 0.0001 | 0.80 | <0.0001 |
| **CHA2DS2-VASc-R1** | **0.75 | <0.0001 | **0.83 | <0.0001 |
| **CHA2DS2-VASc-R2** | **0.77 | <0.0001 | **0.85 | <0.0001 |
| **CHA2DS2-VASc-R3** | **0.76 | <0.0001 | **0.84 | <0.0001 |

In the table are presented, for each of the risk score models, the C-statistic values both for in-hospital and post discharge mortality.

CHA2DS2-VASc-R1 = eGFR <60 ml/min/1.73mq=1 point; CHA2DS2-VASc-R2 = eGFR <60 ml/min/1.73mq=2 points; CHA2DS2-VASc-R3 = eGFR <60 ml/min/1.73mq=1 point, <30 ml/min/1.73mq=2 points; IHM = in-hospital mortality; PDM = post discharge mortality; NSTE-ACS = non-ST-elevation acute coronary syndrome; STEMI = ST-elevation myocardial infarction

**P<0.02 vs CHA2DS2-VASc
